# Supplementary material for: Optimal multisensory decision-making in a reaction-time task
Source: eLife journal article supplement (doi:10.7554/elife.03005), 2014-06-14
Supplement: supp [file elife-03005-supp-v1.zip]

Archive with 7 entries (7 files):
- elife_poa_e03005_Figure_7_figure_supplement_2.pdf
- elife_poa_e03005_Figure_2_figure_supplement_1.pdf
- elife_poa_e03005_Figure_7_figure_supplement_1.pdf
- elife_poa_e03005_Figure_3_figure_supplement_2.pdf
- elife_poa_e03005_Supplementary_File_1.pdf
- elife_poa_e03005_Supplementary_File_2.pdf
- elife_poa_e03005_Figure_3_figure_supplement_1.pdf
