# Supplementary material for: Optimal multisensory decision-making in a reaction-time task
Source: eLife journal article supplement (doi:10.7554/elife.03005), 2014-06-14
Supplement: supp [file elife-03005-supp-v1.zip › elife_poa_e03005_Figure_2_figure_supplement_1.pdf]

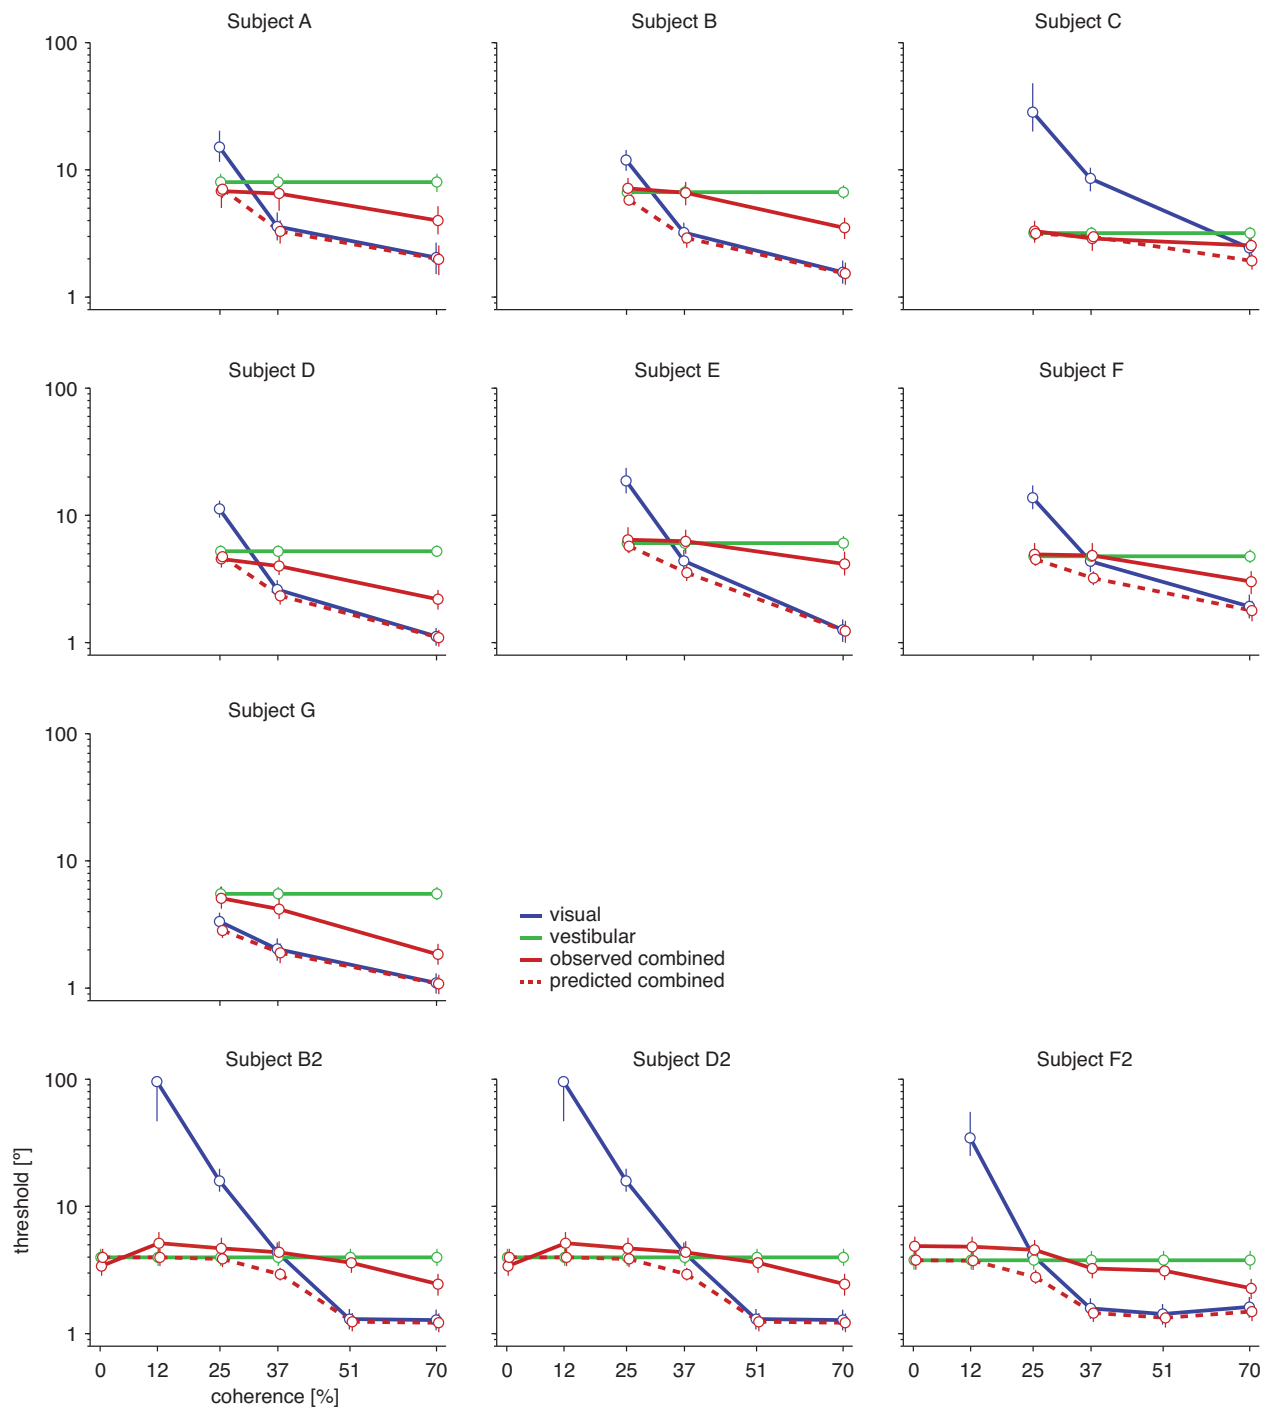

**Figure 2 - figure supplement 1. Discrimination thresholds for all subjects and conditions.** The psychophysical thresholds are found by fitting a cumulative Gaussian function to the psychometric curve for each condition. The predicted threshold is based on the visual and vestibular thresholds measured at the same coherence. The error bars indicate bootstrapped 95% CIs. Note that the observed thresholds in the combined condition (solid red curves) are consistently greater than the predicted thresholds (dashed red curves), especially at high coherences. For a statistical comparison between various thresholds see Supplementary Table 1.
