# Supplementary material for: Optimal multisensory decision-making in a reaction-time task
Source: eLife journal article supplement (doi:10.7554/elife.03005), 2014-06-14
Supplement: supp [file elife-03005-supp-v1.zip › elife_poa_e03005_Figure_3_figure_supplement_1.pdf]

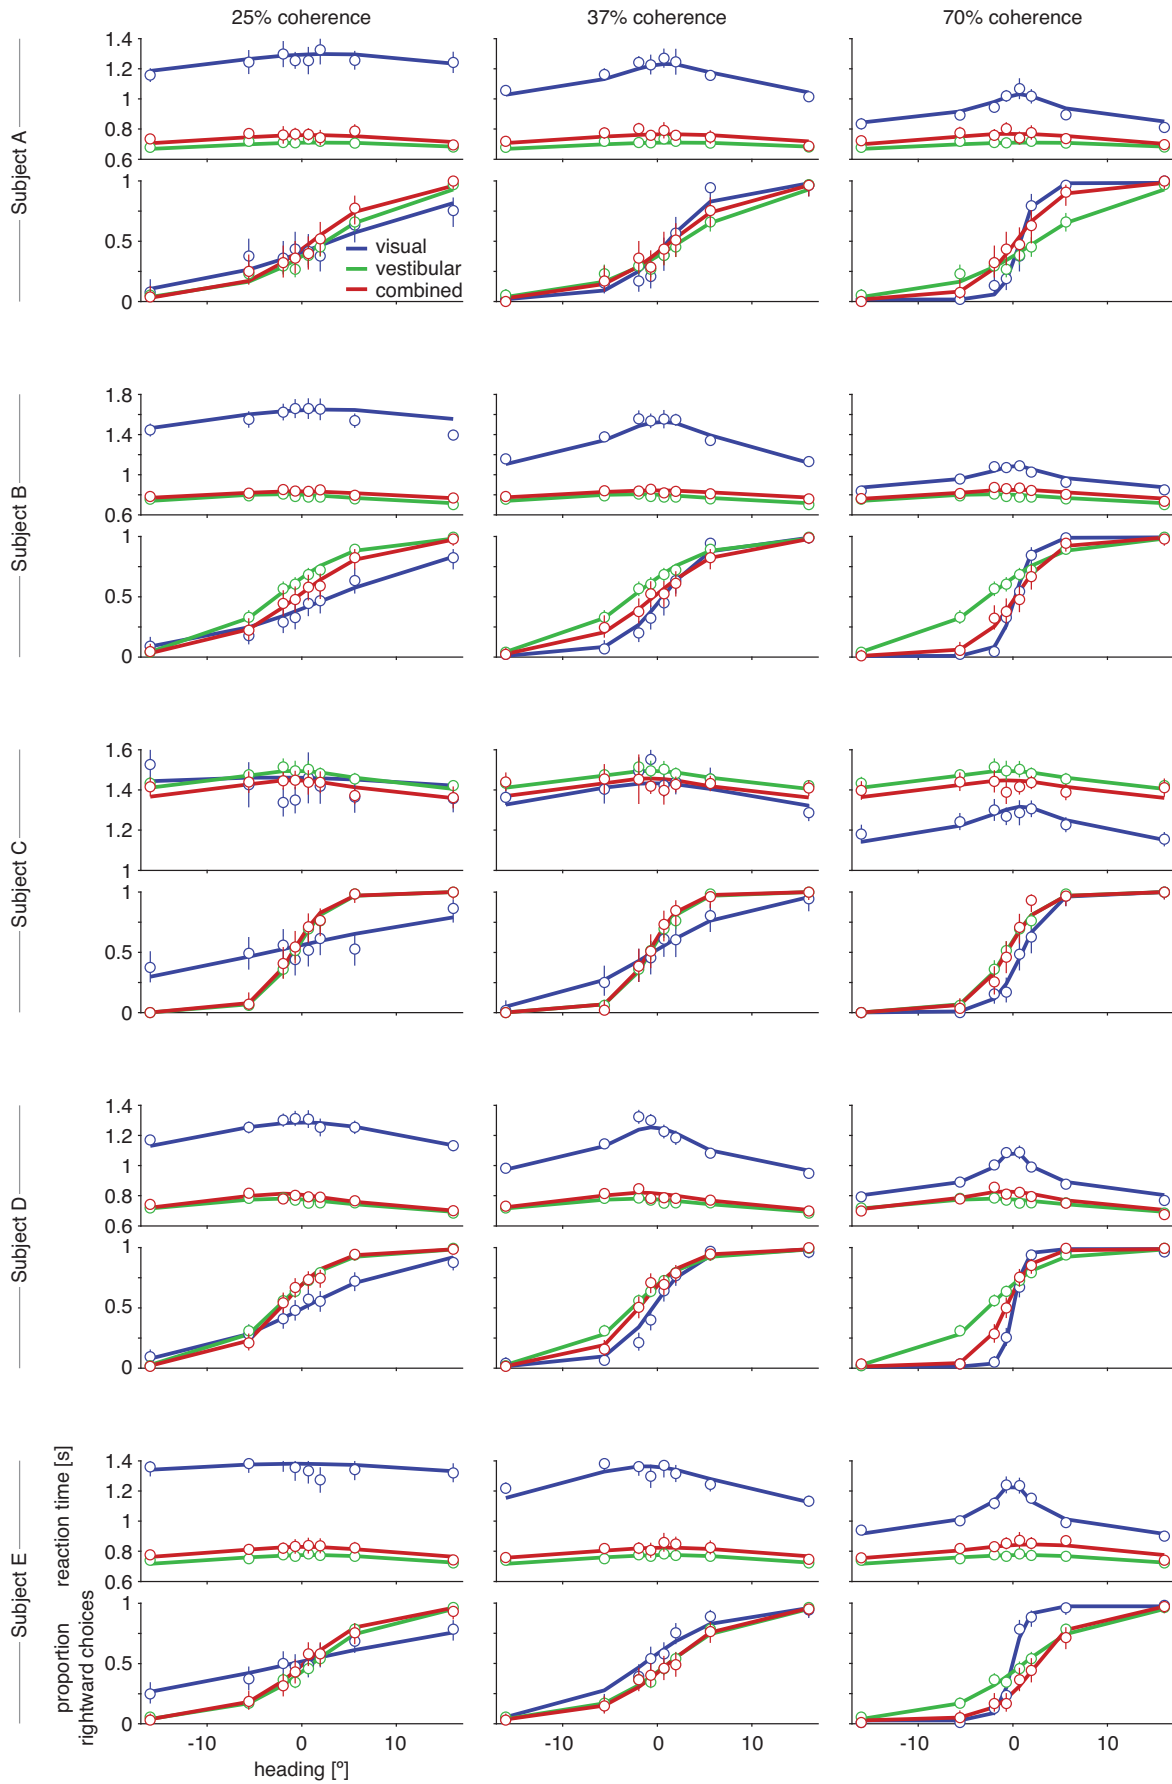

**Figure 3 - figure supplement 1. Psychometric functions, chronometric functions, and model fits for all subjects.** Behavioral data (symbols with error bars) and model fits (lines) are, for clarity, shown separately for each different coherence of the visual motion stimulus. The reaction time shown is the mean reaction time for correct trials, with error bars showing two SEMs (sometimes smaller than the symbols). Error bars on the proportion of rightward choices are 95% confidence intervals. Note that reaction times are shown only for correct trials, while the model is fit to both correct and incorrect trials.

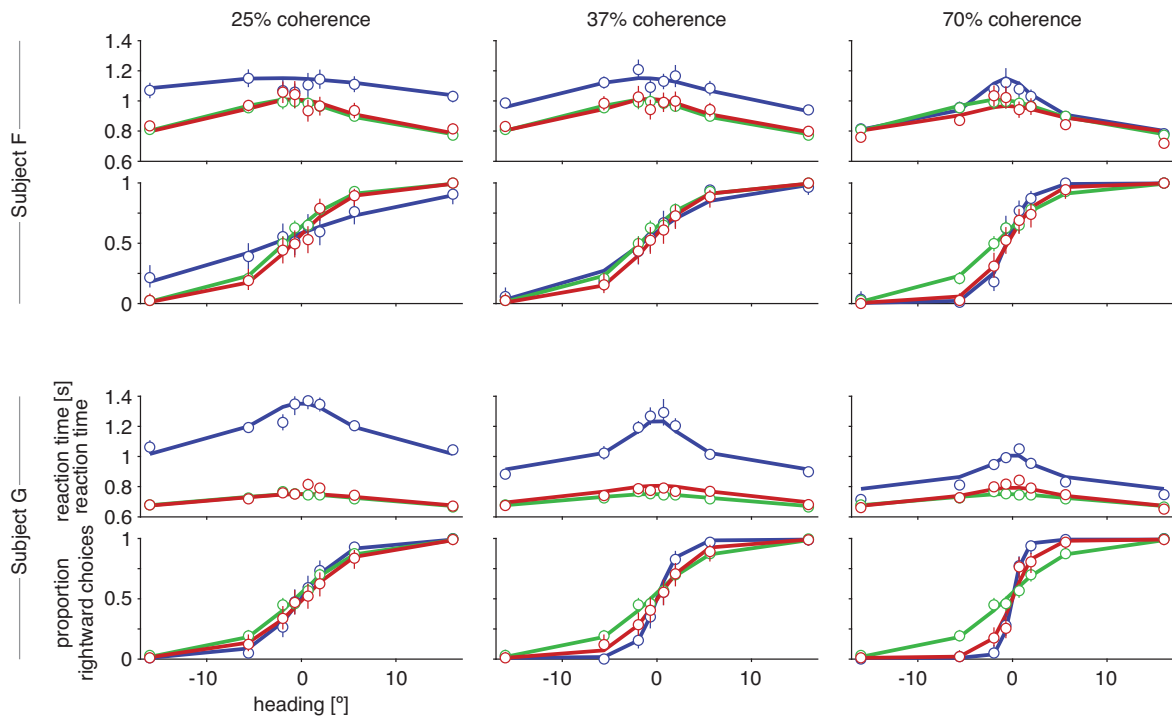

Figure 3 - figure supplement 1. Psychometric functions, chronometric functions, and model fits for all subjects (continued).

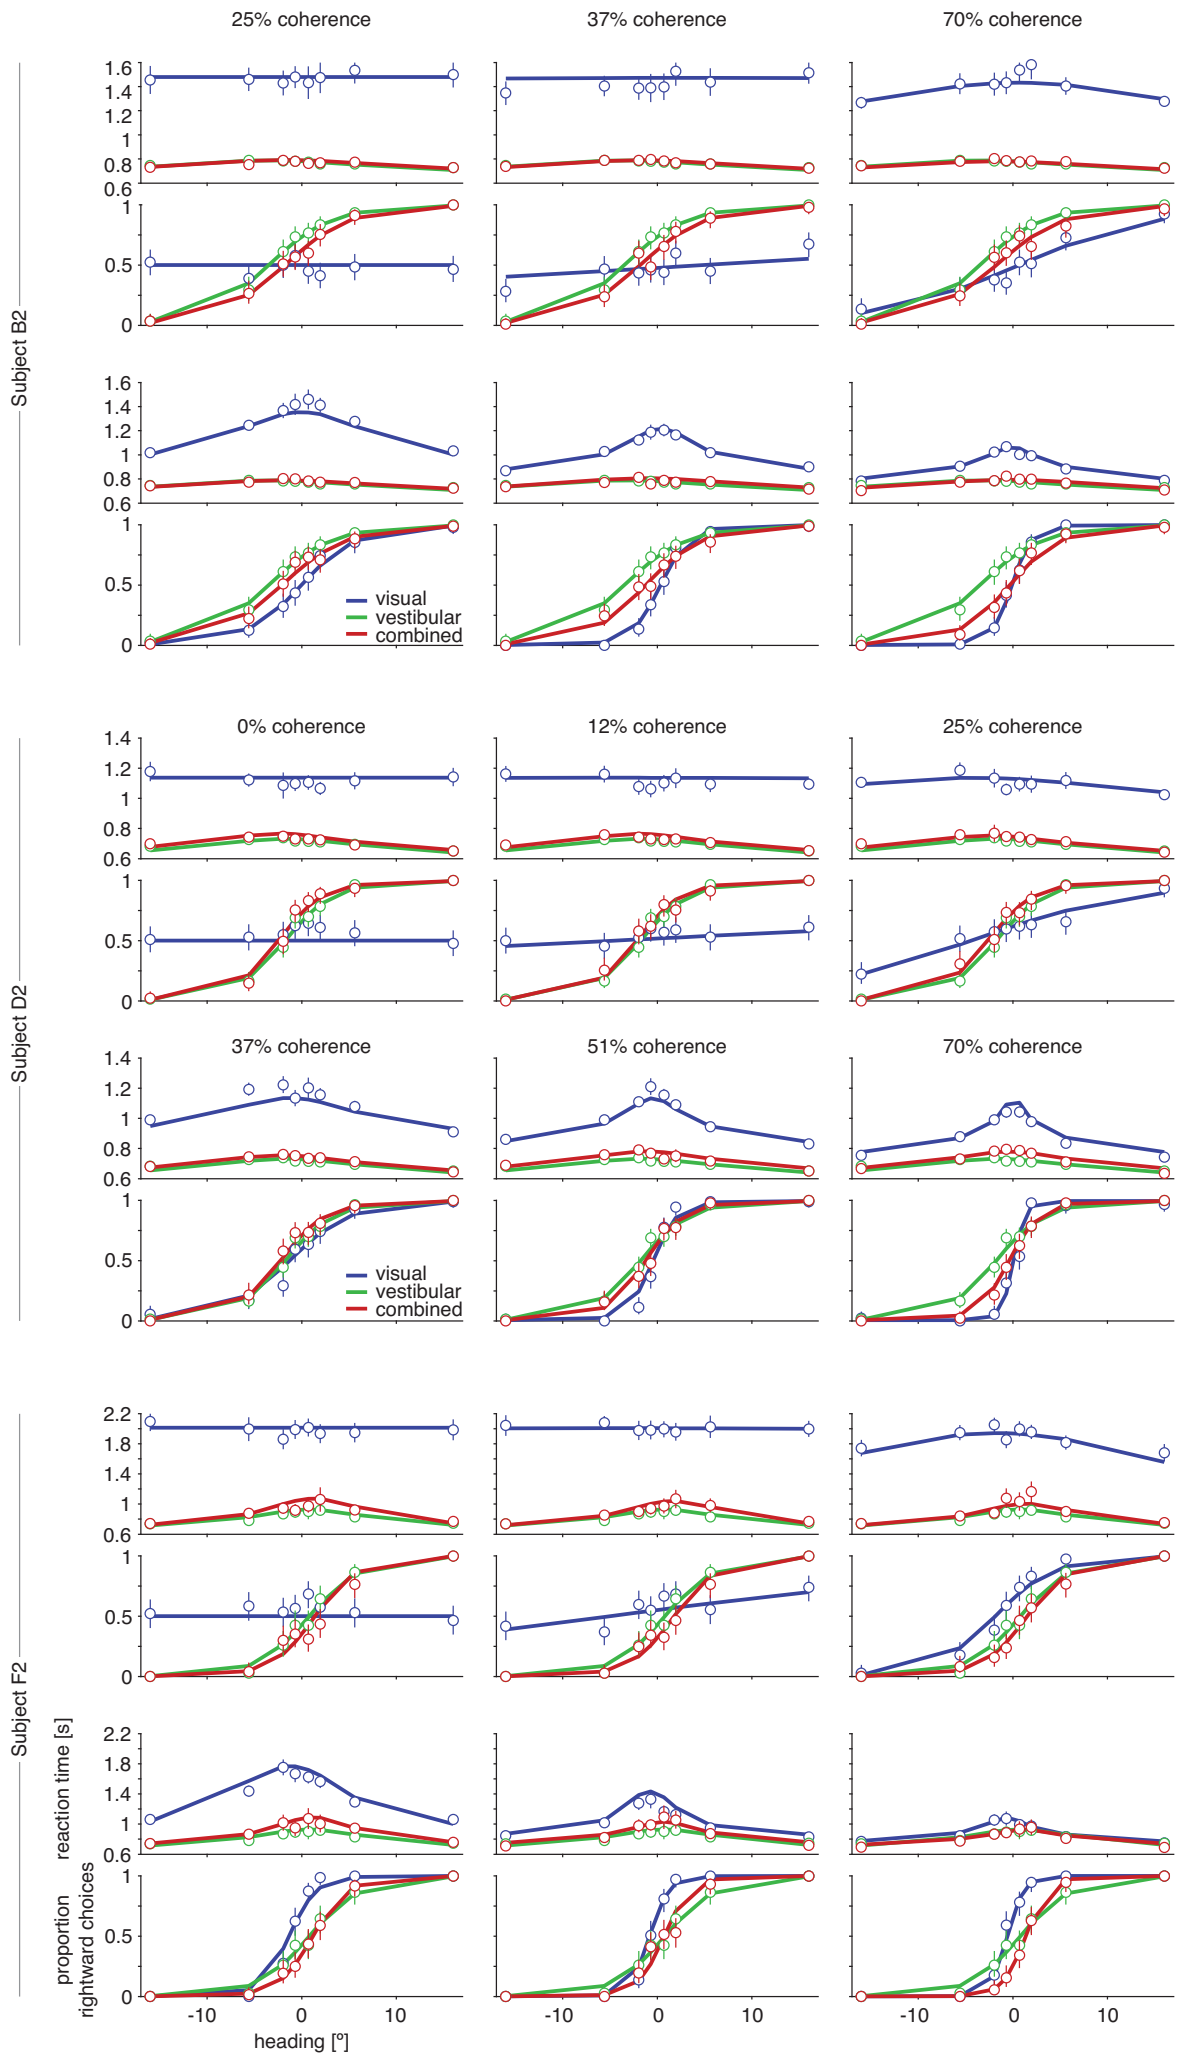

Figure 3 - figure supplement 1. Psychometric functions, chronometric functions, and model fits for all subjects (continued).
