# Supplementary material for: Optimal multisensory decision-making in a reaction-time task
Source: eLife journal article supplement (doi:10.7554/elife.03005), 2014-06-14
Supplement: supp [file elife-03005-supp-v1.zip › elife_poa_e03005_Supplementary_File_2.pdf]

# **Optimal multisensory decision-making in a reaction-time task**

## **Outcome of additional statistical hypothesis tests**

Jan Drugowitsch, Gregory C. DeAngelis, Eliana M. Klier,  
Dora E. Angelaki, Alexandre Pouget

| Subject | $\sigma_{comb}(c) < \min\{\sigma_{vis}(c), \sigma_{vest}\}$ |     |      |     |     |     | $\sigma_{comb}(c) > \sigma_{vis}(c)$ |     |              |              |     |          | $\sigma_{comb}(c) > \sigma_{pred}(c)$ |       |       |          |     |              | $\sigma_{comb}(c) < \sigma_{vest}$ |
|---------|-------------------------------------------------------------|-----|------|-----|-----|-----|--------------------------------------|-----|--------------|--------------|-----|----------|---------------------------------------|-------|-------|----------|-----|--------------|------------------------------------|
|         | 0%                                                          | 12% | 25%  | 37% | 51% | 70% | 0%                                   | 12% | 25%          | 37%          | 51% | 70%      | 0%                                    | 12%   | 25%   | 37%      | 51% | 70%          | 70%                                |
| A       |                                                             |     | 1    | 1   |     | 1   |                                      |     | 1            | 0.002        |     | 0        |                                       |       | 1     | 0        |     | 0            | 0                                  |
| B       |                                                             |     | 1    | 1   |     | 1   |                                      |     | 1            | 0            |     | 0        |                                       |       | 0.287 | 0        |     | 0            | 0                                  |
| C       |                                                             |     | 1    | 1   |     | 1   |                                      |     | 1            | <b>1</b>     |     | <b>1</b> |                                       |       | 1     | <b>1</b> |     | <b>0.168</b> | <b>0.210</b>                       |
| D       |                                                             |     | 0.57 | 1   |     | 1   |                                      |     | 1            | 0            |     | 0        |                                       |       | 1     | 0        |     | 0            | 0                                  |
| E       |                                                             |     | 1    | 1   |     | 1   |                                      |     | 1            | 0.027        |     | 0        |                                       |       | 1     | 0        |     | 0            | 0.007                              |
| F       |                                                             |     | 1    | 1   |     | 1   |                                      |     | 1            | <b>0.662</b> |     | 0.006    |                                       |       | 1     | 0        |     | 0            | 0                                  |
| G       |                                                             |     | 1    | 1   |     | 1   |                                      |     | <b>0.005</b> | 0            |     | 0        |                                       |       | 0     | 0        |     | 0            | 0                                  |
| B2      | 1                                                           | 1   | 1    | 1   | 1   | 1   | 1                                    | 1   | 1            | <b>0.696</b> | 0   | 0        | 1                                     | 1     | 0.072 | 0        | 0   | 0            | 0.039                              |
| D2      | 1                                                           | 1   | 1    | 1   | 1   | 1   | 1                                    | 1   | 1            | <b>1</b>     | 0   | 0        | 1                                     | 0.377 | 0.813 | 0.007    | 0   | 0            | 0                                  |
| F2      | 1                                                           | 1   | 1    | 1   | 1   | 1   | 1                                    | 1   | 1            | 0            | 0   | 0.042    | 0.319                                 | 0.325 | 0     | 0        | 0   | 0            | 0                                  |

**Table A. p-values for comparisons of decision thresholds, for different coherence values of the visual stimulus.** The performed tests are indicated in the first row (*vis* = visual-only condition, *vest* = vest-only condition, *comb* = combined condition, *pred* = predicted threshold, *c* = coherence). From left to right, the four tests conducted are: i) whether the combined threshold is significantly less than the threshold of the more sensitive modality, ii) whether the combined threshold is significantly greater than the visual threshold, iii) whether the combined threshold is significantly greater than the predicted threshold, and iv) whether the combined threshold is significantly less than the vestibular threshold. The p-values in bold indicate deviations from the general effects reported in the main text. The p-values are computed from 5000 bootstrapped samples for each threshold, and are Bonferroni-corrected for multiple one-tailed comparisons. p=0 represents p<0.0001

| Subject                                   | 25% coherence |               |               |               | 37% coherence |               |               |               | 70% coherence |               |               |               |
|-------------------------------------------|---------------|---------------|---------------|---------------|---------------|---------------|---------------|---------------|---------------|---------------|---------------|---------------|
|                                           | 0.69°         | 1.96°         | 5.6°          | 16°           | 0.69°         | 1.96°         | 5.6°          | 16°           | 0.69°         | 1.96°         | 5.6°          | 16°           |
| Miller's bound violations (bold = p<0.05) |               |               |               |               |               |               |               |               |               |               |               |               |
| A                                         | 1             | 0.9473        | 0.9867        | 1             | 1             | 1             | 0.9996        | 0.9317        | 1             | 1             | 1             | 0.9978        |
| B                                         | 1             | 1             | 1             | 1             | 1             | 1             | 1             | 1             | 1             | 1             | 1             | 1             |
| C                                         | 0.8943        | 1             | 0.9537        | 0.7310        | 0.9681        | 0.8782        | 1             | 1             | 0.9250        | 1             | 0.9749        | 0.9973        |
| D                                         | 0.5775        | 0.9606        | 0.9553        | 0.9958        | 1             | 1             | 0.9933        | 0.9919        | 1             | 0.9952        | 1             | 0.2127        |
| E                                         | 1             | 1             | 0.6683        | 0.9159        | 0.9928        | 0.9839        | 0.9840        | 0.9840        | 1             | 1             | 1             | 1             |
| F                                         | 0.8853        | 0.7483        | 1             | 0.8086        | 0.9655        | 0.9910        | 1             | 0.9674        | 0.9896        | 0.6454        | 0.9986        | 0.0890        |
| G                                         | 0.9335        | 0.9777        | 0.6540        | 0.4549        | 0.7447        | 0.9394        | 0.8502        | 0.4544        | 0.9927        | 0.9182        | 0.9344        | 0.0358        |
| Grice's bound violations (bold = p<0.05)  |               |               |               |               |               |               |               |               |               |               |               |               |
| A                                         | <b>0.0001</b> | <b>0.0346</b> | <b>0</b>      | 0.0701        | <b>0</b>      | <b>0.0025</b> | <b>0.0361</b> | <b>0.0373</b> | <b>0.0102</b> | <b>0.0189</b> | <b>0.0005</b> | 0.1195        |
| B                                         | <b>0</b>      | <b>0.0007</b> | <b>0</b>      |
| C                                         | <b>0.0070</b> | <b>0.0119</b> | <b>0.0398</b> | <b>0.0016</b> | 0.8851        | <b>0.0267</b> | 0.2593        | <b>0</b>      | <b>0</b>      | <b>0</b>      | <b>0</b>      | <b>0</b>      |
| D                                         | <b>0.0002</b> | <b>0</b>      | <b>0.0138</b> | <b>0.0050</b> | <b>0</b>      | <b>0</b>      | <b>0.0171</b> | <b>0.0158</b> | <b>0</b>      | <b>0</b>      | 0.1867        | 0.9706        |
| E                                         | <b>0.0094</b> | <b>0.0394</b> | <b>0.0039</b> | 0.0750        | <b>0.0002</b> | <b>0.0080</b> | <b>0.0377</b> | <b>0.0078</b> | <b>0</b>      | <b>0</b>      | <b>0</b>      | <b>0.0016</b> |
| F                                         | 0.5889        | 0.4669        | 0.2710        | <b>0.0090</b> | 0.1625        | 0.3408        | 0.0671        | 0.0878        | 0.6905        | 0.7897        | 0.8045        | 1             |
| G                                         | <b>0.0002</b> | 0.0823        | 0.1451        | 0.1495        | <b>0.0199</b> | <b>0.0116</b> | <b>0.0053</b> | <b>0.0378</b> | <b>0</b>      | <b>0</b>      | <b>0</b>      | 0.9364        |

**Table B. Comparing observed reaction time distributions to those predicted by a parallel race model, subjects A-G.** Parallel race models predict the reaction time distribution in the combined condition, based on those observed in the two unimodal conditions. We tested for all heading/coherence combinations if these predictions matched the observed behavior. A violation of Miller's bound (Miller 1982) or Grice's bound (Grice, Canham et al. 1984) implies that the subject reacted significantly faster or slower, respectively, than predicted by a parallel race model. The table shows the uncorrected p-values resulting from a one-sided two-sample Kolmogorov-Smirnov test between the observed distributions and those corresponding to either of the two bounds. Values in boldface are significant bound violations, based on a Bonferroni-corrected threshold at 0.05.

| Subject                                   | 0.69°         | 1.96°         | 5.6°          | 16°           | 0.69°         | 1.96°    | 5.6°          | 16°      | 0.69°         | 1.96°         | 5.6°          | 16°           |
|-------------------------------------------|---------------|---------------|---------------|---------------|---------------|----------|---------------|----------|---------------|---------------|---------------|---------------|
| Miller's bound violations (bold = p<0.05) |               |               |               |               |               |          |               |          |               |               |               |               |
|                                           | 0% coherence  |               |               |               | 12% coherence |          |               |          | 25% coherence |               |               |               |
| B2                                        | 0.1007        | 0.3100        | 0.2449        | 0.2197        | 0.7388        | 0.7375   | 0.5766        | 0.4710   | 0.5262        | 0.7974        | 0.8567        | 0.4561        |
| D2                                        | 0.9966        | 0.9701        | 0.9573        | 0.9213        | 0.9968        | 0.9892   | 0.9908        | 0.9964   | 0.9302        | 0.9888        | 0.9933        | 0.8156        |
| F2                                        | 1             | 1             | 1             | 1             | 0.9969        | 0.9974   | 0.9978        | 0.9981   | 1             | 1             | 1             | 1             |
|                                           | 37% coherence |               |               |               | 51% coherence |          |               |          | 70% coherence |               |               |               |
| B2                                        | 0.7311        | 0.9129        | 0.9245        | 0.8675        | 0.5534        | 0.7226   | 0.7937        | 0.4994   | 0.1135        | 0.4465        | 0.3904        | 0.1012        |
| D2                                        | 1             | 1             | 1             | 0.9890        | 1             | 1        | 0.9977        | 0.9963   | 1             | 1             | 1             | 1             |
| F2                                        | 1             | 1             | 1             | 1             | 0.9515        | 0.9592   | 0.9652        | 0.7781   | 0.1522        | 0.2088        | 0.2094        | 0.0043        |
| Grice's bound violations (bold = p<0.05)  |               |               |               |               |               |          |               |          |               |               |               |               |
|                                           | 0% coherence  |               |               |               | 12% coherence |          |               |          | 25% coherence |               |               |               |
| B2                                        | 0.5949        | 0.6636        | 0.6041        | 0.5912        | 0.5061        | 0.2075   | 0.0961        | 0.1455   | 0.1108        | 0.0781        | 0.0162        | 0.0408        |
| D2                                        | <b>0</b>      | <b>0</b>      | <b>0</b>      | <b>0</b>      | 0.0012        | <b>0</b> | <b>0</b>      | <b>0</b> | <b>0</b>      | <b>0</b>      | <b>0</b>      | <b>0</b>      |
| F2                                        | <b>0.0030</b> | <b>0.0006</b> | <b>0</b>      | <b>0</b>      | <b>0.0004</b> | <b>0</b> | <b>0</b>      | <b>0</b> | <b>0.0033</b> | <b>0.0020</b> | <b>0.0001</b> | <b>0.0003</b> |
|                                           | 37% coherence |               |               |               | 51% coherence |          |               |          | 70% coherence |               |               |               |
| B2                                        | 0.0619        | 0.0201        | 0.0106        | 0.0093        | 0.7827        | 0.4873   | 0.1659        | 0.3565   | 0.0697        | <b>0.0012</b> | <b>0.0008</b> | 0.0044        |
| D2                                        | <b>0</b>      | <b>0</b>      | <b>0</b>      | <b>0</b>      | <b>0</b>      | <b>0</b> | <b>0</b>      | <b>0</b> | <b>0</b>      | <b>0</b>      | <b>0</b>      | <b>0</b>      |
| F2                                        | 0.0153        | 0.0106        | <b>0.0004</b> | <b>0.0002</b> | 0.0083        | 0.0061   | <b>0.0028</b> | 0.0179   | 0.9530        | 0.9137        | 0.9257        | 0.9347        |

**Table B (continued). Comparing observed reaction time distributions to those predicted by a parallel race model, subjects B2, D2, F2.** See previous page for details.

| Subject | 2-way ANOVA |    |         |         |       | JB | Friedman test |          |   |
|---------|-------------|----|---------|---------|-------|----|---------------|----------|---|
|         | factor      | df | df(err) | F       | p     |    | df            | $\chi^2$ | p |
| A       | mod         | 1  | 1636    | 1167.45 | 0     | 7  | 1             | 467.07   | 0 |
|         | head        | 3  |         | 47.00   | 0     |    |               |          |   |
|         | int         | 3  |         | 26.26   | 0     |    |               |          |   |
| B       | mod         | 1  | 2867    | 1847.41 | 0     | 5  | 1             | 706.80   | 0 |
|         | head        | 3  |         | 204.96  | 0     |    |               |          |   |
|         | int         | 3  |         | 47.61   | 0     |    |               |          |   |
| C       | mod         | 1  | 1805    | 450.91  | 0     | 7  | 1             | 347.14   | 0 |
|         | head        | 3  |         | 23.34   | 0     |    |               |          |   |
|         | int         | 3  |         | 3.71    | 0.011 |    |               |          |   |
| D       | mod         | 1  | 4320    | 1720.95 | 0     | 8  | 1             | 935.21   | 0 |
|         | head        | 3  |         | 316.96  | 0     |    |               |          |   |
|         | int         | 3  |         | 107.02  | 0     |    |               |          |   |
| E       | mod         | 1  | 3254    | 2536.39 | 0     | 5  | 1             | 872.80   | 0 |
|         | head        | 3  |         | 126.10  | 0     |    |               |          |   |
|         | int         | 3  |         | 62.97   | 0     |    |               |          |   |
| F       | mod         | 1  | 2691    | 41.64   | 0     |    | 1             | 35.77    | 0 |
|         | head        | 3  |         | 167.17  | 0     |    |               |          |   |
|         | int         | 3  |         | 8.63    | 0     |    |               |          |   |
| G       | mod         | 1  | 3074    | 1459.71 | 0     | 7  | 1             | 565.61   | 0 |
|         | head        | 3  |         | 388.60  | 0     |    |               |          |   |
|         | int         | 3  |         | 115.67  | 0     |    |               |          |   |
| B2      | mod         | 1  | 1419    | 1428.33 | 0     | 2  | 1             | 604.62   | 0 |
|         | head        | 3  |         | 211.32  | 0     |    |               |          |   |
|         | int         | 3  |         | 113.57  | 0     |    |               |          |   |
| D2      | mod         | 1  | 1786    | 2214.62 | 0     | 5  | 1             | 792.66   | 0 |
|         | head        | 3  |         | 308.53  | 0     |    |               |          |   |
|         | int         | 3  |         | 127.79  | 0     |    |               |          |   |
| F2      | mod         | 1  | 1428    | 67.64   | 0     | 8  | 1             | 87.26    | 0 |
|         | head        | 3  |         | 171.53  | 0     |    |               |          |   |
|         | int         | 3  |         | 11.39   | 0     |    |               |          |   |

**Table C. Statistical tests applied to comparing reaction times between 70%-coherence visual-only condition and vestibular-only condition.** 2-way ANOVA: factors are modality (mod; 70% visual vs. vestibular), heading direction (head), and interaction (int); df(err) = df of error term; F = F statistics; p = p-value (p=0 represents p<0.0001). The JB column reports the number of violations (out of 8; 4 x visual, 4 x vestibular) of the normality assumption (Jarque-Bera, p<0.05). All tests are performed on the natural logarithm of the reaction time. These tests confirm that, for all subjects, the reaction times differ significantly between the visual and vestibular conditions. Except for subject C, who responded significantly slower, all subjects responded faster in the vestibular condition than in the 70% coherence visual condition (see Figure 3-figure supplement 1)

## ***References***

- Grice, G. R., L. Canham, et al. (1984). "Combination rule for redundant information in reaction time tasks with divided attention." Percept Psychophys **35**(5): 451-463.
- Miller, J. (1982). "Divided attention: evidence for coactivation with redundant signals." Cogn Psychol **14**(2): 247-279.
